# Supplementary material for: Competition and cooperativity of hydrogen-bonding and tetrel-bonding interactions involving triethylene diamine (DABCO), H2O and CO2in air
Source: Royal Society of Chemistry journal article supplement (doi:10.1039/c9nj06036g), 2020-01-01
Supplement: c9nj06036g1.pdf [file c9nj06036g1.pdf]

## Supporting Information

### **Competitivity and cooperativity of hydrogen-bonding and tetrel-bonding interactions involving triethylene diamines (DABCO), H<sub>2</sub>O and CO<sub>2</sub> in air**

*Jianming Yang,<sup>\*a</sup> Qinwei Yu,<sup>a</sup> Fang-Ling Yang,<sup>b</sup> Ka Lu,<sup>b</sup> Chao-Xian Yan,<sup>b</sup> Wei Dou,<sup>b</sup> Lizi Yang,*

*<sup>b</sup> Pan-Pan Zhou,<sup>\*b</sup>*

*<sup>a</sup> Xi'an Modern Chemistry Research Institute, Xi'an 710065, Shaanxi, P. R. China. \*E-mail:*

*yangjm204@163.com*

*<sup>b</sup> Key Laboratory of Nonferrous Metal Chemistry and Resources Utilization of Gansu Province,*

*College of Chemistry and Chemical Engineering, Lanzhou University, 222 South Tianshui Road,*

*730000, Lanzhou, P. R. China. \*E-mail: zhoupp@lzu.edu.cn*

**Table S1** The bond angles ( $\theta$ , in  $^\circ$ ) of CO<sub>2</sub> in the dimers (**D2**, **D3**, **D5**) and trimers (**T2**, **T3**, **T5**, **T6**, **T7**, **T8**, **T9**) at the M06-2X/aug-cc-pVDZ level of theory without (non-CP) and with the CP methods, and the corresponding parameters of CO<sub>2</sub>.

|                 | Method | Bond angle                                                                         |
|-----------------|--------|------------------------------------------------------------------------------------|
| <b>D2</b>       | Non-CP | $\theta(\text{O2-C1-O3})=177.9$                                                    |
|                 | CP     | $\theta(\text{O2-C1-O3})=178.0$                                                    |
| <b>D3</b>       | Non-CP | $\theta(\text{O2-C1-O3})=180.0$ ; $\theta(\text{O2}'\text{-C1}'\text{-O3}')=179.5$ |
|                 | CP     | $\theta(\text{O2-C1-O3})=180.0$ ; $\theta(\text{O2}'\text{-C1}'\text{-O3}')=179.5$ |
| <b>D5</b>       | Non-CP | $\theta(\text{O2-C1-O3})=175.7$                                                    |
|                 | CP     | $\theta(\text{O2-C1-O3})=176.0$                                                    |
| <b>T2</b>       | Non-CP | $\theta(\text{O2-C1-O3})=175.9$                                                    |
|                 | CP     | $\theta(\text{O2-C1-O3})=176.1$                                                    |
| <b>T3</b>       | Non-CP | $\theta(\text{O2-C1-O3})=175.8$ ; $\theta(\text{O2}'\text{-C1}'\text{-O3}')=175.8$ |
|                 | CP     | $\theta(\text{O2-C1-O3})=176.0$ ; $\theta(\text{O2}'\text{-C1}'\text{-O3}')=176.0$ |
| <b>T5</b>       | Non-CP | $\theta(\text{O2-C1-O3})=175.1$ ; $\theta(\text{O2}'\text{-C1}'\text{-O3}')=178.9$ |
|                 | CP     | $\theta(\text{O2-C1-O3})=175.3$ ; $\theta(\text{O2}'\text{-C1}'\text{-O3}')=179.0$ |
| <b>T6</b>       | Non-CP | $\theta(\text{O2-C1-O3})=176.6$                                                    |
|                 | CP     | $\theta(\text{O2-C1-O3})=176.7$                                                    |
| <b>T7</b>       | Non-CP | $\theta(\text{O2-C1-O3})=177.4$                                                    |
|                 | CP     | $\theta(\text{O2-C1-O3})=177.5$                                                    |
| <b>T8</b>       | Non-CP | $\theta(\text{O2-C1-O3})=177.5$                                                    |
|                 | CP     | $\theta(\text{O2-C1-O3})=177.4$                                                    |
| <b>T9</b>       | Non-CP | $\theta(\text{O2-C1-O3})=174.3$                                                    |
|                 | CP     | $\theta(\text{O2-C1-O3})=174.6$                                                    |
| CO <sub>2</sub> | Non-CP | $\theta(\text{O2-C1-O3})=180.0$                                                    |

**Table S2** The bond lengths ( $R$ , in Å) and stretching vibrational frequencies ( $\nu$ , in  $\text{cm}^{-1}$ ) for the dimers **D1-D5** at the M06-2X/aug-cc-pVDZ level of theory without (non-CP) and with the CP methods, and the corresponding parameters for DABCO,  $\text{H}_2\text{O}$  and  $\text{CO}_2$ .

|                      | Method | $R$                      | $\nu$                     |
|----------------------|--------|--------------------------|---------------------------|
| <b>D1</b>            | Non-CP | $R_{\text{O1-H1}}=0.969$ | $\nu_{\text{O1-H1}}=3770$ |
|                      | CP     | $R_{\text{O1-H1}}=0.969$ | $\nu_{\text{O1-H1}}=3775$ |
| <b>D2</b>            | Non-CP | $R_{\text{O1-H1}}=0.962$ | $\nu_{\text{O1-H1}}=3866$ |
|                      |        | $R_{\text{C1-O2}}=1.162$ | $\nu_{\text{C1-O2}}=1403$ |
|                      | CP     | $R_{\text{O1-H1}}=0.962$ | $\nu_{\text{O1-H1}}=3864$ |
|                      |        | $R_{\text{C1-O2}}=1.162$ | $\nu_{\text{C1-O2}}=1403$ |
| <b>D3</b>            | Non-CP | $R_{\text{C1-O2}}=1.162$ | $\nu_{\text{C1-O2}}=1409$ |
|                      | CP     | $R_{\text{C1-O2}}=1.162$ | $\nu_{\text{C1-O2}}=1409$ |
| <b>D4</b>            | Non-CP | $R_{\text{O1-H1}}=0.979$ | $\nu_{\text{O1-H1}}=3527$ |
|                      | CP     | $R_{\text{O1-H1}}=0.979$ | $\nu_{\text{O1-H1}}=3511$ |
| <b>D5</b>            | Non-CP | $R_{\text{C1-O2}}=1.163$ | $\nu_{\text{C1-O2}}=1396$ |
|                      | CP     | $R_{\text{C1-O2}}=1.163$ | $\nu_{\text{C1-O2}}=1397$ |
| DABCO                | Non-CP | $R_{\text{C2-H3}}=1.098$ | $\nu_{\text{C2-H3}}=3131$ |
|                      |        | $R_{\text{C2-H4}}=1.098$ | $\nu_{\text{C2-H4}}=3131$ |
|                      |        | $R_{\text{C3-H5}}=1.098$ | $\nu_{\text{C3-H5}}=3131$ |
|                      |        | $R_{\text{C3-H6}}=1.098$ | $\nu_{\text{C3-H6}}=3131$ |
|                      |        | $R_{\text{C4-H7}}=1.098$ | $\nu_{\text{C4-H7}}=3131$ |
| $\text{CO}_2$        | Non-CP | $R_{\text{C1-O2}}=1.161$ | $\nu_{\text{C1-O2}}=1407$ |
| $\text{H}_2\text{O}$ | Non-CP | $R_{\text{O1-H1}}=0.962$ | $\nu_{\text{O1-H1}}=3867$ |

**Table S3** The bond lengths ( $R$ , in Å) and stretching vibrational frequencies ( $\nu$ , in  $\text{cm}^{-1}$ ) for the trimers **T1-T9** at the M06-2X/aug-cc-pVDZ level of theory without (non-CP) and with the CP methods.

|           | Method | $R$                        | $\nu$                       |
|-----------|--------|----------------------------|-----------------------------|
| <b>T1</b> | Non-CP | $R_{\text{O1-H1}}=0.978$   | $\nu_{\text{O1-H1}}=3547$   |
|           |        | $R_{\text{O1'-H1'}}=0.978$ | $\nu_{\text{O1'-H1'}}=3547$ |
|           | CP     | $R_{\text{O1-H1}}=0.978$   | $\nu_{\text{O1-H1}}=3545$   |
|           |        | $R_{\text{O1'-H1'}}=0.978$ | $\nu_{\text{O1'-H1'}}=3545$ |
| <b>T2</b> | Non-CP | $R_{\text{O1-H1}}=0.978$   | $\nu_{\text{O1-H1}}=3521$   |
|           |        | $R_{\text{C1-O2}}=1.162$   | $\nu_{\text{C1-O2}}=1397$   |
|           | CP     | $R_{\text{O1-H1}}=0.978$   | $\nu_{\text{O1-H1}}=3535$   |
|           |        | $R_{\text{C1-O2}}=1.162$   | $\nu_{\text{C1-O2}}=1398$   |
| <b>T3</b> | Non-CP | $R_{\text{C1-O2}}=1.163$   | $\nu_{\text{C1-O2}}=1396$   |
|           |        | $R_{\text{C1'-O2'}}=1.163$ | $\nu_{\text{C1'-O2'}}=1396$ |
|           | CP     | $R_{\text{C1-O2}}=1.163$   | $\nu_{\text{C1-O2}}=1397$   |
|           |        | $R_{\text{C1'-O2'}}=1.163$ | $\nu_{\text{C1'-O2'}}=1397$ |
| <b>T4</b> | Non-CP | $R_{\text{O1-H1}}=0.997$   | $\nu_{\text{O1-H1}}=3138$   |
|           |        | $R_{\text{O1'-H1'}}=0.977$ | $\nu_{\text{O1'-H1'}}=3616$ |
|           |        | $R_{\text{C3-H5}}=1.096$   | $\nu_{\text{C3-H5}}=3140$   |
|           |        | $R_{\text{C4-H7}}=1.096$   | $\nu_{\text{C4-H7}}=3152$   |
|           | CP     | $R_{\text{O1-H1}}=0.996$   | $\nu_{\text{O1-H1}}=3139$   |
|           |        | $R_{\text{O1'-H1'}}=0.976$ | $\nu_{\text{O1'-H1'}}=3630$ |
|           |        | $R_{\text{C3-H5}}=1.097$   | $\nu_{\text{C3-H5}}=3139$   |
|           |        | $R_{\text{C4-H7}}=1.096$   | $\nu_{\text{C4-H7}}=3152$   |
| <b>T5</b> | Non-CP | $R_{\text{C1-O2}}=1.164$   | $\nu_{\text{C1-O2}}=1399$   |
|           |        | $R_{\text{C1'-O3'}}=1.163$ | $\nu_{\text{C1'-O3'}}=1404$ |
|           |        | $R_{\text{C3-H5}}=1.097$   | $\nu_{\text{C3-H5}}=3141$   |
|           |        | $R_{\text{C4-H7}}=1.097$   | $\nu_{\text{C4-H7}}=3132$   |
|           | CP     | $R_{\text{C1-O2}}=1.164$   | $\nu_{\text{C1-O2}}=1395$   |
|           |        | $R_{\text{C1'-O3'}}=1.063$ | $\nu_{\text{C1'-O3'}}=1405$ |
|           |        | $R_{\text{C3-H5}}=1.097$   | $\nu_{\text{C3-H5}}=3139$   |
|           |        | $R_{\text{C4-H7}}=1.097$   | $\nu_{\text{C4-H7}}=3130$   |
| <b>T6</b> | Non-CP | $R_{\text{O1-H1}}=0.985$   | $\nu_{\text{O1-H1}}=3379$   |
|           |        | $R_{\text{C1-O3}}=1.163$   | $\nu_{\text{C1-O3}}=1400$   |
|           |        | $R_{\text{C3-H5}}=1.096$   | $\nu_{\text{C3-H5}}=3145$   |
|           |        | $R_{\text{C4-H7}}=1.096$   | $\nu_{\text{C4-H7}}=3140$   |
|           | CP     | $R_{\text{O1-H1}}=0.985$   | $\nu_{\text{O1-H1}}=3392$   |
|           |        | $R_{\text{C1-O3}}=1.163$   | $\nu_{\text{C1-O3}}=1401$   |
|           |        | $R_{\text{C3-H5}}=1.097$   | $\nu_{\text{C3-H5}}=3144$   |
|           |        | $R_{\text{C4-H7}}=1.097$   | $\nu_{\text{C4-H7}}=3141$   |
| <b>T7</b> | Non-CP | $R_{\text{O1-H1}}=0.963$   | $\nu_{\text{O1-H1}}=3865$   |
|           |        | $R_{\text{C1-O3}}=1.165$   | $\nu_{\text{C1-O3}}=1395$   |
|           | CP     | $R_{\text{O1-H1}}=0.963$   | $\nu_{\text{O1-H1}}=3866$   |
|           |        | $R_{\text{C1-O3}}=1.165$   | $\nu_{\text{C1-O3}}=1360$   |

|           |        |                   |                  |
|-----------|--------|-------------------|------------------|
| <b>T8</b> | Non-CP | $R_{O1-H1}=0.981$ | $v_{O1-H1}=3447$ |
|           |        | $R_{C1-O2}=1.161$ | $v_{C1-O2}=1401$ |
|           |        | $R_{C2-H3}=1.097$ | $v_{C2-H3}=3135$ |
|           |        | $R_{C3-H6}=1.096$ | $v_{C3-H6}=3138$ |
|           | CP     | $R_{O1-H1}=0.982$ | $v_{O1-H1}=3463$ |
|           |        | $R_{C1-O2}=1.161$ | $v_{C1-O2}=1401$ |
|           |        | $R_{C2-H3}=1.098$ | $v_{C2-H3}=3137$ |
|           |        | $R_{C3-H6}=1.097$ | $v_{C3-H6}=3138$ |
| <b>T9</b> | Non-CP | $R_{O1-H1}=0.966$ | $v_{O1-H1}=3827$ |
|           |        | $R_{C1-O3}=1.166$ | $v_{C1-O3}=1392$ |
|           |        | $R_{C2-H4}=1.096$ | $v_{C2-H4}=3137$ |
|           |        | $R_{C4-H8}=1.096$ | $v_{C4-H8}=3141$ |
|           | CP     | $R_{O1-H1}=0.966$ | $v_{O1-H1}=3830$ |
|           |        | $R_{C1-O3}=1.166$ | $v_{C1-O3}=1393$ |
|           |        | $R_{C2-H4}=1.097$ | $v_{C2-H4}=3136$ |
|           |        | $R_{C4-H8}=1.096$ | $v_{C4-H8}=3139$ |

**Table S4** The difference ( $\Delta d_1$ , in Å) between the intermolecular distance ( $d_i$ , in Å) in the dimer and the sum of the van der Waals radii ( $d_r$ , in Å) involved in the intermolecular interaction.<sup>a</sup>

|              | $d_i$                                    | $d_r$                               | $\Delta d_1$ |
|--------------|------------------------------------------|-------------------------------------|--------------|
| <b>D1</b>    | $d_{i(\text{O1}'\cdots\text{H1})}=1.939$ | $d_{r(\text{O1}', \text{H1})}=2.60$ | 0.661        |
| <b>D2</b>    | $d_{i(\text{O1}\cdots\text{C1})}=2.667$  | $d_{r(\text{O1}, \text{C1})}=3.10$  | 0.433        |
| <b>D3</b>    | $d_{i(\text{O2}\cdots\text{C1}')}=2.885$ | $d_{r(\text{O2}, \text{C1}')}=3.10$ | 0.215        |
| <b>D4</b>    | $d_{i(\text{H1}\cdots\text{N1})}=1.883$  | $d_{r(\text{H1}, \text{N1})}=2.70$  | 0.817        |
| <b>D5</b>    | $d_{i(\text{C1}\cdots\text{N1})}=2.671$  | $d_{r(\text{C1}, \text{N1})}=3.20$  | 0.529        |
| <sup>a</sup> | $\Delta d_1=$                            | $d_r$                               | - $d_i$ .    |

**Table S5** The difference ( $\Delta d_2$ , in Å) between the intermolecular distance ( $d_i$ , in Å) in the trimer and the sum of the van der Waals radii ( $d_r$ , in Å) involved in the intermolecular interaction, and the cooperativity factor ( $B_d$ ).

|           | $d_i$                                    | $d_r$                               | $\Delta d_2^a$ | $B_d^b$ |
|-----------|------------------------------------------|-------------------------------------|----------------|---------|
| <b>T1</b> | $d_{i(\text{H1}\cdots\text{N1})}=1.892$  | $d_{r(\text{H1}, \text{N1})}=2.70$  | 0.808          | 0.989   |
|           | $d_{i(\text{H1}'\cdots\text{N2})}=1.892$ | $d_{r(\text{H1}', \text{N2})}=2.70$ | 0.808          | 0.989   |
| <b>T2</b> | $d_{i(\text{H1}\cdots\text{N1})}=1.890$  | $d_{r(\text{H1}, \text{N1})}=2.70$  | 0.810          | 0.991   |
|           | $d_{i(\text{C1}\cdots\text{N2})}=2.677$  | $d_{r(\text{C1}, \text{N2})}=3.20$  | 0.523          | 0.989   |
| <b>T3</b> | $d_{i(\text{C1}\cdots\text{N1})}=2.676$  | $d_{r(\text{C1}, \text{N1})}=3.20$  | 0.524          | 0.991   |
|           | $d_{i(\text{C1}'\cdots\text{N2})}=2.676$ | $d_{r(\text{C1}', \text{N2})}=3.20$ | 0.524          | 0.991   |
| <b>T4</b> | $d_{i(\text{H1}\cdots\text{N1})}=1.744$  | $d_{r(\text{H1}, \text{N1})}=2.70$  | 0.956          | 1.170   |
|           | $d_{i(\text{H1}'\cdots\text{O1})}=1.834$ | $d_{r(\text{H1}', \text{O1})}=2.60$ | 0.766          | 1.159   |
| <b>T5</b> | $d_{i(\text{C1}\cdots\text{N1})}=2.648$  | $d_{r(\text{C1}, \text{N1})}=3.20$  | 0.552          | 1.043   |
|           | $d_{i(\text{C1}'\cdots\text{O2})}=2.772$ | $d_{r(\text{C1}', \text{O2})}=3.10$ | 0.328          | 1.526   |
| <b>T6</b> | $d_{i(\text{H1}\cdots\text{N1})}=1.827$  | $d_{r(\text{H1}, \text{N1})}=2.70$  | 0.873          | 1.069   |
|           | $d_{i(\text{C1}\cdots\text{O1})}=2.613$  | $d_{r(\text{C1}, \text{O1})}=3.10$  | 0.487          | 1.125   |
| <b>T7</b> | $d_{i(\text{C1}\cdots\text{N1})}=2.711$  | $d_{r(\text{C1}, \text{N1})}=3.20$  | 0.489          | 0.924   |
| <b>T8</b> | $d_{i(\text{H1}\cdots\text{N1})}=1.850$  | $d_{r(\text{H1}, \text{N1})}=2.70$  | 0.850          | 1.040   |
|           | $d_{i(\text{O1}\cdots\text{C1})}=2.789$  | $d_{r(\text{O1}, \text{C1})}=3.10$  | 0.311          | 0.718   |

<sup>a</sup>  $\Delta d_2 = d_r - d_i$ .

<sup>b</sup>  $B_d = \Delta d_2 / \Delta d_1$ . Note that the intermolecular distance in the trimer has correspondence with that in the dimer.

**Table S6** The geometries and interaction energies ( $\Delta E_{\text{int}}$ , in kcal/mol) of the ingredients in trimers **T1-T8** at the M06-2X/aug-cc-pVDZ level of theory without the CP methods, and the sum of the interaction energies ( $\Delta E_{\text{sum}}$ , in kcal/mol) of the ingredients.

|           | Geometry                                                                            | $\Delta E_{\text{int}}$ | $\Delta E_{\text{sum}}$ |
|-----------|-------------------------------------------------------------------------------------|-------------------------|-------------------------|
| <b>T1</b> | 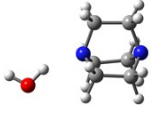   | -8.66                   | -17.32                  |
|           |    | -8.66                   |                         |
| <b>T2</b> |    | -8.77                   | -14.77                  |
|           |    | -6.00                   |                         |
| <b>T3</b> |    | -5.98                   | -11.96                  |
|           |  | -5.98                   |                         |
| <b>T4</b> |  | -8.99                   | -17.13                  |
|           |  | -3.14                   |                         |
|           |  | -5.00                   |                         |
| <b>T5</b> |  | -6.06                   | -8.28                   |
|           |  | -1.01                   |                         |
|           |  | -1.21                   |                         |
|           |  | -1.21                   |                         |



---

|           |                                                                                     |       |        |
|-----------|-------------------------------------------------------------------------------------|-------|--------|
| <b>T6</b> | 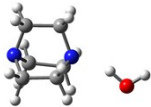   | -8.89 |        |
|           |    | -1.15 | -13.69 |
|           |    |       |        |
|           |    | -3.65 |        |
| <b>T7</b> |    |       |        |
|           |    | -5.73 | -8.75  |
|           |    | -3.02 |        |
| <b>T8</b> |    | -8.33 |        |
|           |   | -3.97 | -13.47 |
|           |  |       |        |
|           |  | -1.17 |        |

---

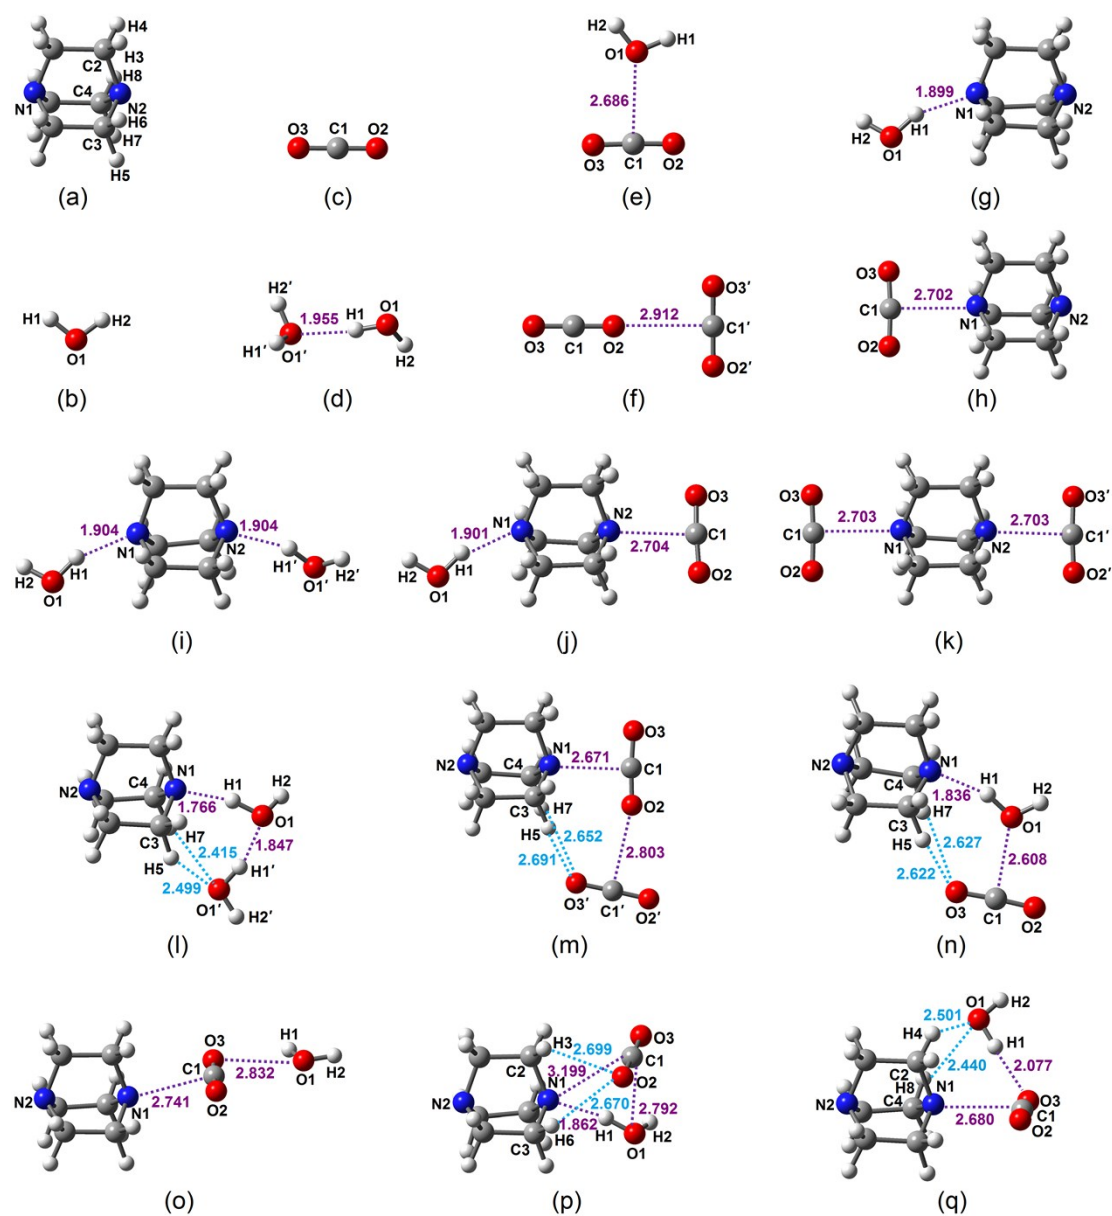

**Fig. S1** The optimized geometries of the monomers (a) DABCO; (b) H<sub>2</sub>O; (c) CO<sub>2</sub>; and the dimers (d) **D1**; (e) **D2**; (f) **D3**; (g) **D4**; (h) **D5**; and the trimers (i) **T1**; (j) **T2**; (k) **T3**; (l) **T4**; (m) **T5**; (n) **T6**; (o) **T7**; (p) **T8**; (q) **T9** and the intermolecular distances (Å) for these complexes at the M06-2X/aug-cc-pVDZ level of theory with CP optimization.
